# Supplementary material for: Reliability and Validity of Commercially Available Wearable Devices for Measuring Steps, Energy Expenditure, and Heart Rate: Systematic Review
Source: PubMed Central journal article supplement (PMC7509623; doi:10.2196/18694), 2020-09-08
Supplement: mhealth_v8i9e18694_app1.pdf [file mhealth_v8i9e18694_app1.pdf]

## SEARCH STRATEGIES

### PubMed (searched 28 May 2019)

1. "Accelerometry"[Mesh]
2. acceleromet\*[tw]
3. "Fitness Trackers"[Mesh]
4. "activity monitor"[tw] OR "activity monitors"[tw] OR "activity monitoring"[tw] OR "activity tracker"[tw] OR "activity trackers"[tw] OR "activity tracking"[tw]
5. "fitness tracker"[tw] OR "fitness trackers"[tw] OR "fitness tracking"[tw]
6. "step count"[tw] OR "step counter"[tw] OR "step counters"[tw] OR "step counting"[tw]
7. "wearable device"[tw] OR "wearable devices"[tw]
8. fitbit[tw] OR "garmin"[tw] OR "misfit shine"[tw] OR (misfit[tw] AND (phase[tw] OR flare[tw] OR ray[tw])) OR "polar loop"[tw] OR "jawbone up24"[tw] OR (jawbone[tw] AND up[tw]) OR (under[tw] AND armour[tw]) OR samsung[tw] OR geneactiv[tw] OR empatica[tw] OR mio[tw] OR amiigo[tw] OR xiaomi[tw] OR actigraph[tw] OR "apple watch"[tw] OR withings[tw] OR sensewear[tw]
9. 1 OR 2 OR 3 OR 4 OR 5 OR 6 OR 7 OR 8
10. "Comparative Study"[pt] OR "Validation Studies"[pt] OR "Evaluation Studies"[pt]
11. "Validation Studies as Topic"[Mesh] OR "Evaluation Studies as Topic"[Mesh:NoExp] OR "Reproducibility of Results"[Mesh]
12. valid\*[tiab] OR compar\*[tiab] OR accura\*[tiab] OR reliab\*[tiab]
13. 10 OR 11 OR 12
14. 9 AND 13
15. 14 AND 2000:3000[dp]
16. 15 AND "English"[la]

### Embase (searched 28 May 2019)

1. 'accelerometry'/exp OR 'accelerometer'/exp
2. acceleromet\*:ti,ab
3. 'activity tracker'/exp
4. "activity monitor\*":ti,ab OR "activity tracker\*":ti,ab
5. "fitness monitor\*":ti,ab OR "fitness tracker\*":ti,ab
6. "step count\*":ti,ab
7. "wearable device\*":ti,ab
8. fitbit\*:ti,ab OR garmin:ti,ab OR "misfit shine":ti,ab OR "misfit phase":ti,ab OR "misfit flare":ti,ab OR "misfit ray":ti,ab OR "polar loop":ti,ab OR "jawbone up\*":ti,ab OR "under armour":ti,ab OR samsung:ti,ab OR geneactiv:ti,ab OR empatica:ti,ab OR mio:ti,ab OR amiigo:ti,ab OR xiaomi:ti,ab OR actigraph:ti,ab OR "apple watch":ti,ab OR withings:ti,ab OR sensewear:ti,ab
9. 1 OR 2 OR 3 OR 4 OR 5 OR 6 OR 7 OR 8
10. 'comparative study'/de OR 'comparative effectiveness'/exp OR 'device comparison'/exp OR 'validation study'/exp OR 'evaluation study'/de OR 'measurement precision'/exp
11. valid\*:ti,ab OR compar\*:ti,ab OR accura\*:ti,ab OR reliab\*:ti,ab
12. 10 OR 11

13. 9 AND 12
14. #13 AND [2000-3000]/py
15. #14 AND [english]/lim

**SPORTDiscus** (searched 28 May 2019)

1. acceleromet\*
2. "activity monitor\*" OR "activity tracker"
3. "fitness monitor\*" OR "fitness tracker"
4. "step count"
5. "wearable device\*" OR "wearable technology"
6. fitbit\* OR garmin OR "misfit shine" OR "misfit phase" OR "misfit flare" OR "misfit flare"  
OR "misfit ray" OR "polar loop" OR "jawbone up\*" OR "under armour" OR samsung OR  
geneactiv OR empatica OR mio OR amiigo OR xiaomi OR actigraph OR "apple watch"  
OR withings OR sensewear
7. 1 OR 2 OR 3 OR 4 OR 5 OR 6
8. valid\* OR compar\* OR accura\* OR reliab\*
9. #7 AND #8
10. #9 AND Limiters - Published Date: 20000101-20191231
11. #10 AND Narrow by Language: - english
