# Supplementary material for: Reliability and Validity of Commercially Available Wearable Devices for Measuring Steps, Energy Expenditure, and Heart Rate: Systematic Review
Source: PubMed Central journal article supplement (PMC7509623; doi:10.2196/18694), 2020-09-08
Supplement: mhealth_v8i9e18694_app3.pdf [file mhealth_v8i9e18694_app3.pdf]

**Scenarios where publications were split into sub-studies** (demographics must be reported separately in publication):

1. Controlled and free-living data collected from two different sets of subjects
  - a. Block (2017) x2
  - b. Kooiman (2015) x2
  - c. Lee (2015) x2
  - d. Rowe (2019) x2
  - e. Thorup (2017) x2
2. Two different activity paradigms conducted on two different sets of subjects (ex. overground ambulation with a group of subjects and treadmill ambulation with a subset of that group)
  - a. Battenberg (2017) x2
  - b. Huang (2016) x2
3. Single activity paradigm conducted on distinct groups of subjects with outcomes reported by group
  - a. Different health statuses [Appelboom (2015) x2]
  - b. Different chronic injury [Fulk (2014) x2]
  - c. Different age groups [Modave (2017) x3]
