# Supplementary material for: Reliability and Validity of Commercially Available Wearable Devices for Measuring Steps, Energy Expenditure, and Heart Rate: Systematic Review
Source: PubMed Central journal article supplement (PMC7509623; doi:10.2196/18694), 2020-09-08
Supplement: mhealth_v8i9e18694_app5.pdf [file mhealth_v8i9e18694_app5.pdf]

**DEVICE MODELS**

| Brand  | Model            | Release Year | Model Status | Wear Location |    |     |    | # of Validity Comparisons |    |     | # of Reliability Comparisons |    |    | Total # of Comparisons |             |     |
|--------|------------------|--------------|--------------|---------------|----|-----|----|---------------------------|----|-----|------------------------------|----|----|------------------------|-------------|-----|
|        |                  |              |              | Wr            | WH | LAF | To | HR                        | EE | SC  | HR                           | EE | SC | Validity               | Reliability | All |
| Apple  | Watch            | 2015         | outdated     | x             |    |     |    | 58                        | 26 | 30  | 7                            | 0  | 0  | 114                    | 7           | 121 |
| Apple  | Watch Series 2   | 2016         | outdated     | x             |    |     |    | 9                         | 7  | 1   | 0                            | 0  | 0  | 17                     | 0           | 17  |
| Fitbit | Blaze            | 2016         | outdated     | x             |    |     |    | 16                        | 2  | 0   | 0                            | 0  | 0  | 18                     | 0           | 18  |
| Fitbit | Charge           | 2014         | outdated     | x             |    |     |    | 2                         | 11 | 21  | 0                            | 0  | 1  | 34                     | 1           | 35  |
| Fitbit | Charge 2         | 2016         | outdated     | x             |    |     |    | 38                        | 9  | 30  | 8                            | 0  | 8  | 77                     | 16          | 93  |
| Fitbit | Charge HR        | 2015         | outdated     | x             |    |     |    | 52                        | 37 | 76  | 0                            | 0  | 7  | 165                    | 7           | 172 |
| Fitbit | Classic          | 2008         | outdated     |               | x  | x   |    | 0                         | 20 | 17  | 0                            | 4  | 4  | 37                     | 8           | 45  |
| Fitbit | Flex             | 2013         | outdated     | x             |    | x   |    | 0                         | 28 | 109 | 0                            | 2  | 15 | 137                    | 17          | 154 |
| Fitbit | Flex 2           | 2017         | current      | x             |    |     |    | 0                         | 0  | 0   | 0                            | 1  | 1  | 0                      | 2           | 2   |
| Fitbit | Force            | 2013         | outdated     | x             |    |     |    | 0                         | 0  | 6   | 0                            | 0  | 0  | 6                      | 0           | 6   |
| Fitbit | One              | 2012         | outdated     | x             | x  | x   | x  | 0                         | 36 | 160 | 0                            | 3  | 19 | 196                    | 22          | 218 |
| Fitbit | Surge            | 2015         | outdated     | x             |    |     |    | 9                         | 10 | 18  | 0                            | 0  | 5  | 37                     | 5           | 42  |
| Fitbit | Ultra            | 2011         | outdated     | x             | x  |     | x  | 0                         | 10 | 39  | 0                            | 4  | 4  | 49                     | 8           | 57  |
| Fitbit | Zip              | 2013         | current      |               | x  | x   | x  | 0                         | 7  | 194 | 0                            | 0  | 6  | 201                    | 6           | 207 |
| Garmin | Fenix 3 HR       | 2016         | outdated     | x             |    |     |    | 0                         | 4  | 0   | 0                            | 0  | 0  | 4                      | 0           | 4   |
| Garmin | Forerunner 225   | 2015         | outdated     | x             |    |     |    | 10                        | 5  | 0   | 0                            | 0  | 0  | 15                     | 0           | 15  |
| Garmin | Forerunner 235   | 2015         | current      | x             |    |     |    | 14                        | 0  | 2   | 0                            | 0  | 0  | 16                     | 0           | 16  |
| Garmin | Forerunner 405CX | 2009         | outdated     | x             |    |     |    | 0                         | 0  | 1   | 0                            | 0  | 0  | 1                      | 0           | 1   |
| Garmin | Forerunner 735XT | 2016         | current      | x             |    |     |    | 0                         | 0  | 3   | 0                            | 0  | 0  | 3                      | 0           | 3   |
| Garmin | Forerunner 920XT | 2014         | outdated     | x             |    |     |    | 0                         | 5  | 6   | 0                            | 0  | 0  | 11                     | 0           | 11  |
| Garmin | Vivoactive       | 2015         | outdated     | x             |    |     |    | 0                         | 0  | 6   | 0                            | 0  | 0  | 6                      | 0           | 6   |
| Garmin | Vivofit          | 2014         | outdated     | x             |    |     |    | 0                         | 30 | 81  | 0                            | 0  | 3  | 111                    | 3           | 114 |
| Garmin | Vivofit 2        | 2015         | outdated     | x             |    |     |    | 0                         | 0  | 11  | 0                            | 0  | 0  | 11                     | 0           | 11  |
| Garmin | Vivofit 3        | 2016         | outdated     | x             |    |     |    | 0                         | 0  | 6   | 0                            | 0  | 3  | 6                      | 3           | 9   |
| Garmin | Vivosmart        | 2014         | outdated     | x             |    |     |    | 0                         | 0  | 14  | 0                            | 0  | 0  | 14                     | 0           | 14  |
| Garmin | Vivosmart HR     | 2015         | outdated     | x             |    |     |    | 9                         | 2  | 13  | 0                            | 0  | 0  | 24                     | 0           | 24  |
| Garmin | Vivosmart HR+    | 2016         | current      | x             |    |     |    | 28                        | 6  | 26  | 8                            | 0  | 8  | 60                     | 16          | 76  |
| Mio    | Alpha            | 2013         | outdated     | x             |    |     |    | 13                        | 1  | 0   | 0                            | 0  | 0  | 14                     | 0           | 14  |
| Mio    | Fuse             | 2015         | outdated     | x             |    |     |    | 2                         | 0  | 5   | 0                            | 0  | 0  | 7                      | 0           | 7   |
| Misfit | Flash            | 2015         | outdated     |               | x  |     |    | 0                         | 0  | 6   | 0                            | 0  | 0  | 6                      | 0           | 6   |
| Misfit | Shine            | 2012         | outdated     | x             | x  | x   | x  | 0                         | 8  | 36  | 0                            | 0  | 0  | 44                     | 0           | 44  |
| Polar  | A300             | 2015         | outdated     | x             |    |     |    | 0                         | 1  | 1   | 0                            | 0  | 0  | 2                      | 0           | 2   |
| Polar  | A360             | 2015         | outdated     | x             |    |     |    | 8                         | 2  | 6   | 0                            | 0  | 0  | 16                     | 0           | 16  |
| Polar  | Active           | 2011         | outdated     | x             |    |     |    | 0                         | 0  | 6   | 0                            | 0  | 0  | 6                      | 0           | 6   |
| Polar  | Loop             | 2013         | outdated     | x             |    |     |    | 0                         | 7  | 27  | 0                            | 0  | 1  | 34                     | 1           | 35  |
| Polar  | M600             | 2016         | current      | x             |    |     |    | 0                         | 0  | 1   | 0                            | 0  | 0  | 1                      | 0           | 1   |
| Polar  | V800             | 2014         | outdated     | x             |    |     |    | 0                         | 7  | 1   | 0                            | 0  | 0  | 8                      | 0           | 8   |

**DEVICE MODELS**

| Brand    | Model     | Release Year | Model Status | Wear Location |    |     |    | # of Validity Comparisons |    |    | # of Reliability Comparisons |    |    | Total # of Comparisons |             |     |
|----------|-----------|--------------|--------------|---------------|----|-----|----|---------------------------|----|----|------------------------------|----|----|------------------------|-------------|-----|
|          |           |              |              | Wr            | WH | LAF | To | HR                        | EE | SC | HR                           | EE | SC | Validity               | Reliability | All |
| Samsung  | Gear 2    | 2014         | outdated     | x             |    |     |    | 0                         | 0  | 4  | 0                            | 0  | 0  | 4                      | 0           | 4   |
| Samsung  | Gear S    | 2014         | outdated     | x             |    |     |    | 1                         | 1  | 7  | 0                            | 0  | 0  | 9                      | 0           | 9   |
| Samsung  | Gear S2   | 2015         | outdated     | x             |    |     |    | 0                         | 0  | 3  | 0                            | 0  | 0  | 3                      | 0           | 3   |
| Samsung  | Gear S3   | 2016         | outdated     | x             |    |     |    | 1                         | 1  | 1  | 0                            | 0  | 0  | 3                      | 0           | 3   |
| Withings | Pulse O2  | 2013         | outdated     | x             | x  |     | x  | 0                         | 38 | 50 | 0                            | 36 | 0  | 88                     | 36          | 124 |
| Withings | Pulse Ox  | 2014         | outdated     | x             | x  |     |    | 0                         | 12 | 34 | 0                            | 0  | 8  | 46                     | 8           | 54  |
| Xiaomi   | Mi Band   | 2014         | outdated     | x             |    |     |    | 0                         | 1  | 1  | 0                            | 0  | 0  | 2                      | 0           | 2   |
| Xiaomi   | Mi Band 2 | 2016         | outdated     | x             |    |     |    | 0                         | 0  | 5  | 0                            | 0  | 0  | 5                      | 0           | 5   |
