# Supplementary material for: Reliability and Validity of Commercially Available Wearable Devices for Measuring Steps, Energy Expenditure, and Heart Rate: Systematic Review
Source: PubMed Central journal article supplement (PMC7509623; doi:10.2196/18694), 2020-09-08
Supplement: mhealth_v8i9e18694_app6.pdf [file mhealth_v8i9e18694_app6.pdf]

**CRITERION MEASURES**

| <b>Accelerometry</b>     | <b>Electrocardiography</b> | <b>Indirect calorimetry</b> | <b>Chest Straps</b> | <b>Pulse Oximetry</b> |
|--------------------------|----------------------------|-----------------------------|---------------------|-----------------------|
| Actical                  | ProComp Infiniti T7500M    | COSMED K4b                  | Polar T31           | Nonin PureSAT         |
| Actigraph GT1M           | Quinton Q4500              | COSMED K4b2                 | Polar H7            |                       |
| Actigraph GT3X           | Zensor Intelesens          | COSMED K5                   | Polar PS800CX       |                       |
| Actigraph GT3X+          | CardioSoft                 | Fitmate Pro                 | Polar H6            |                       |
| Actigraph GT3X-BT        | Quinton Q-tel RMS          | Jaeger Oxycon               | Polar T13           |                       |
| Actigraph GT9X Link      | SOMNOmedics GmbH           | Metamax                     | Polar H3            |                       |
| Actigraph wActisleep-BT  | Prucka Electrophysiology   | Metamax 3B                  | Polar WearLink 31   |                       |
| Actigraph wGT3X-BT       | COSMED Quark C12x          | Moxus Modular system        |                     |                       |
| ActiHeart                | Phillips IntelliVue        | Jaeger Oxycon Mobile        |                     |                       |
| ActiTrainer              | BedMasterEx                | Jaeger Oxycon Mobile 5.0    |                     |                       |
| ActivPAL                 | Infinity Delta             | Parvo Medics TrueOne 2400   |                     |                       |
| ActivPAL3                | Biopac MP150               | Sable System                |                     |                       |
| Bodymedia SenseWear      | Quinton Q-Stress           | Ultima CPX                  |                     |                       |
| Bodymedia SenseWear Mini | GE Healthcare CASE         |                             |                     |                       |
| Bodymedia SenseWear Pro  |                            |                             |                     |                       |
| Model X6-2mini           |                            |                             |                     |                       |
| New Lifestyles NL-1000   |                            |                             |                     |                       |
| New Lifestyles NL-2000i  |                            |                             |                     |                       |
| Omron HJ-112             |                            |                             |                     |                       |
